# Supplementary material
Source: PubMed Central journal article supplement (PMC7821912)

# Supplementary figure 1

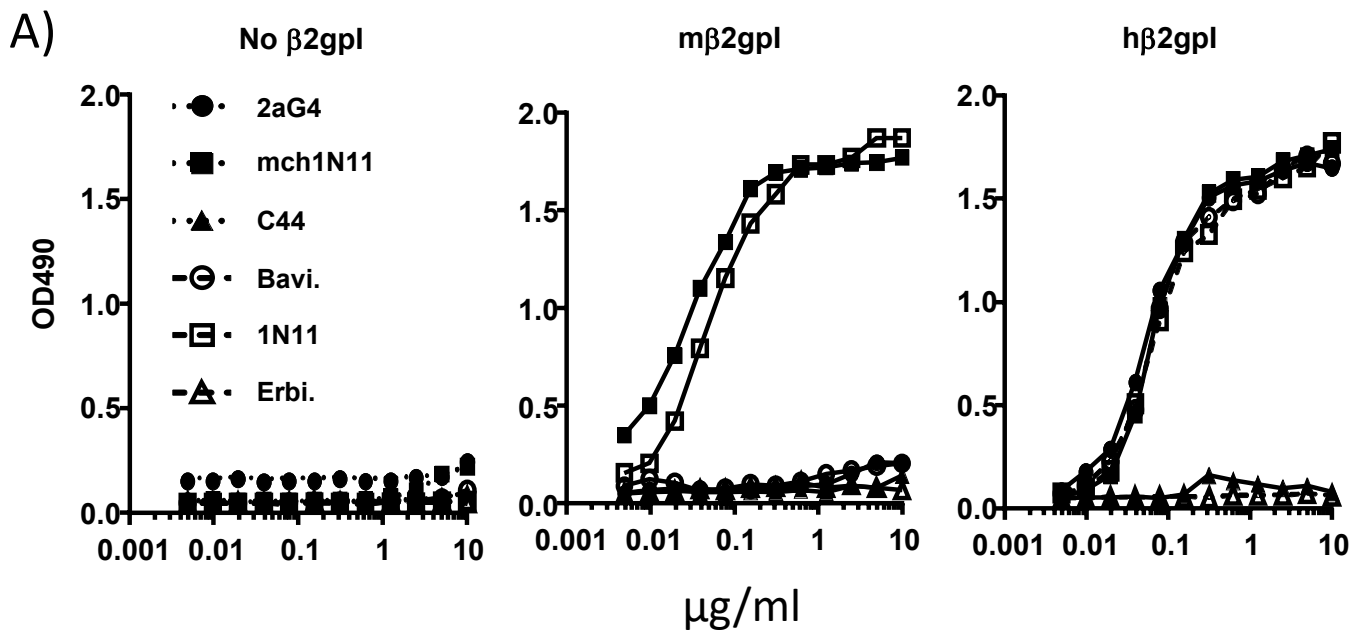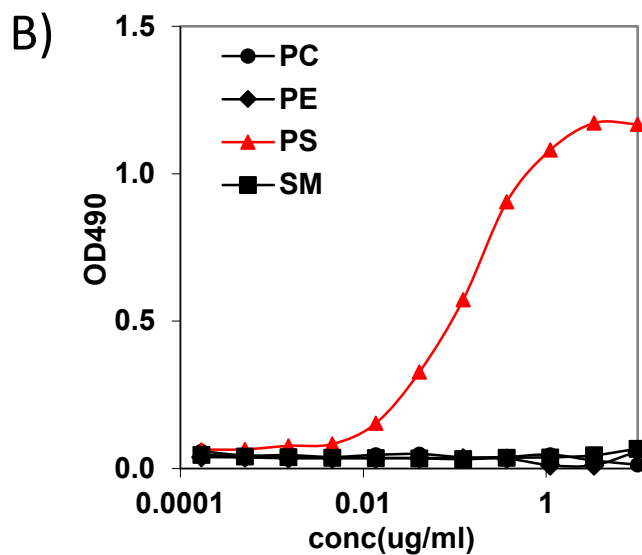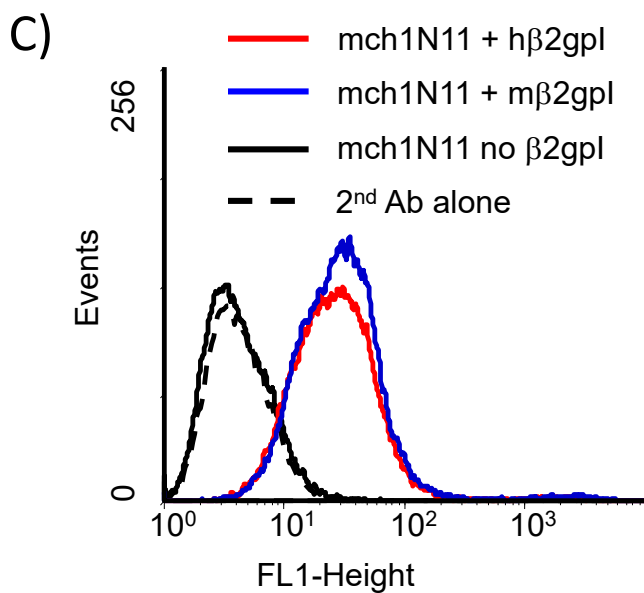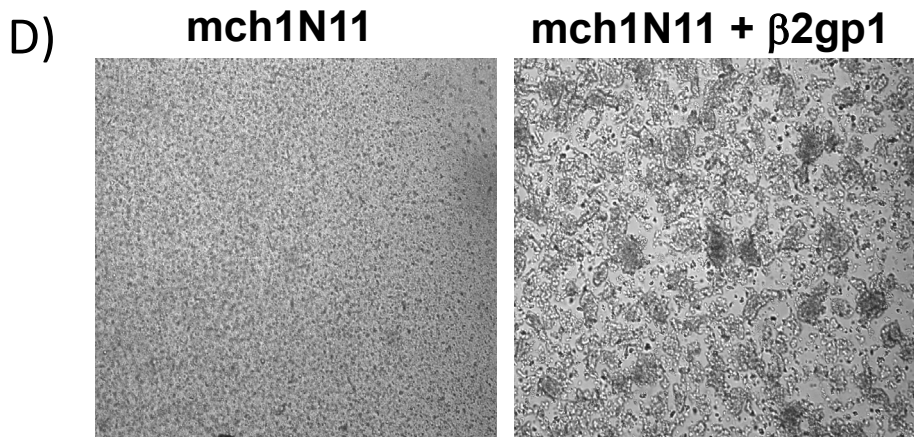

# Supplementary figure 2

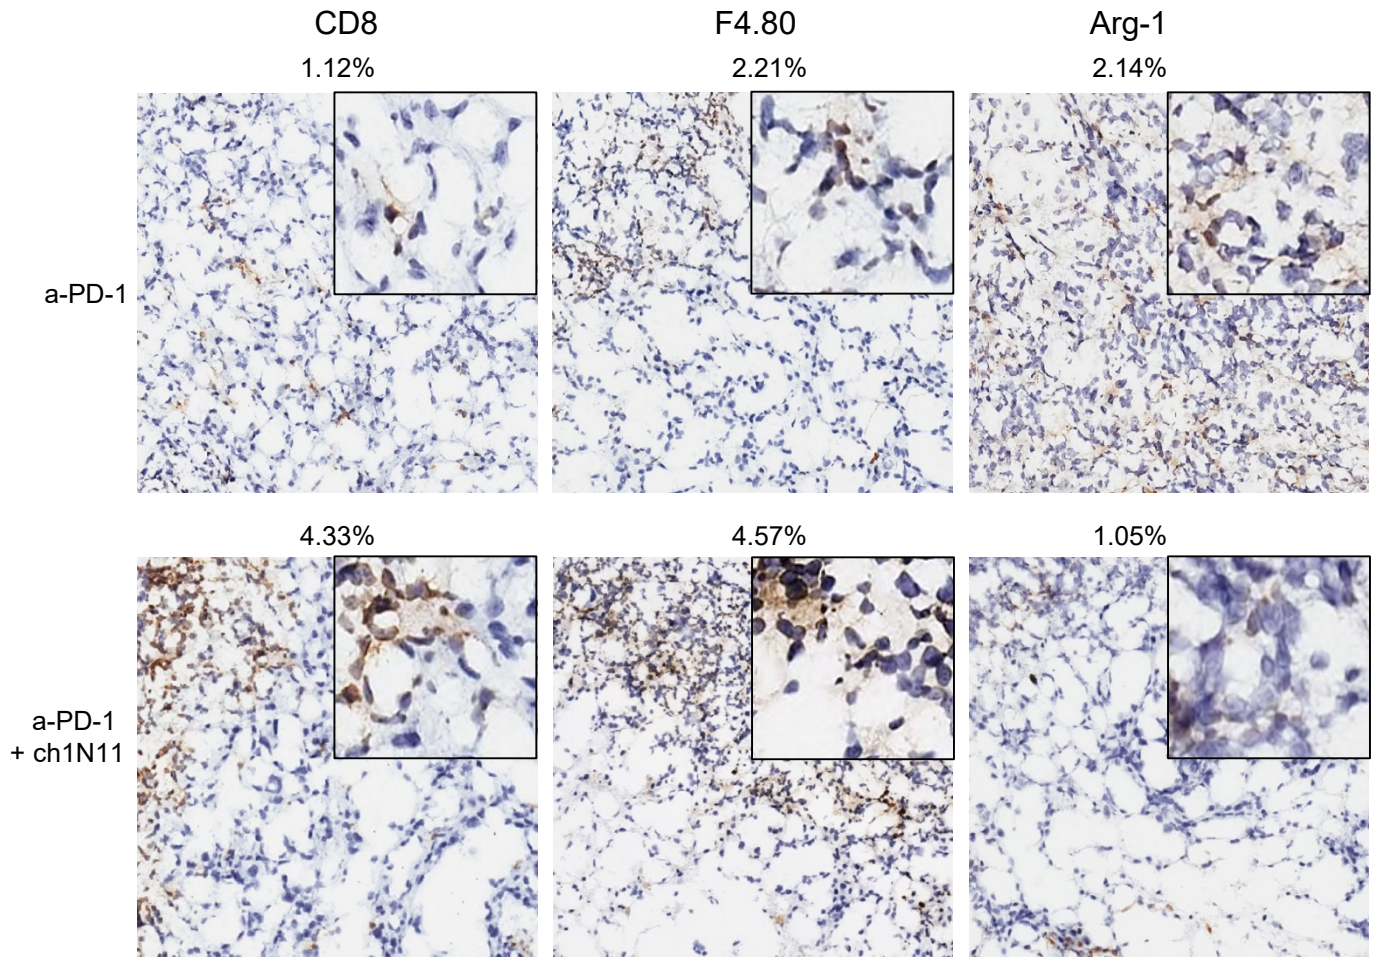

CD8 staining in K1735 tumors

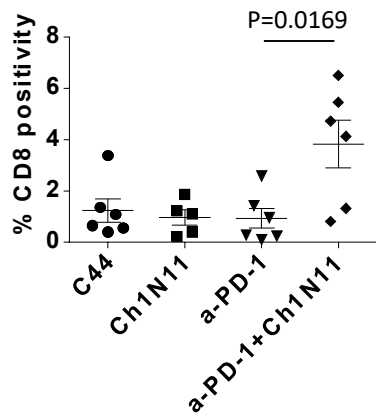

F4/80 staining in K1735 tumors

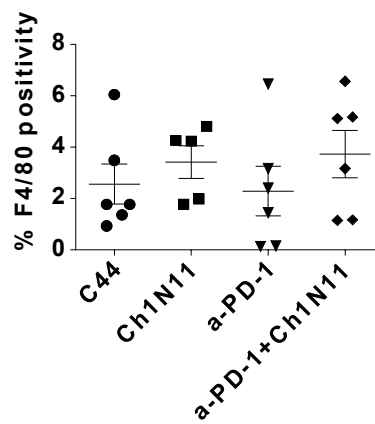

Arg-1 staining in K1735 tumors

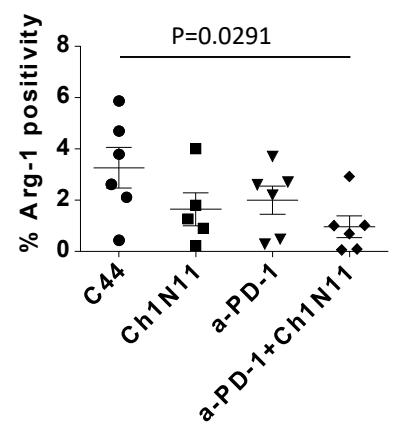

Supplementary figure 3

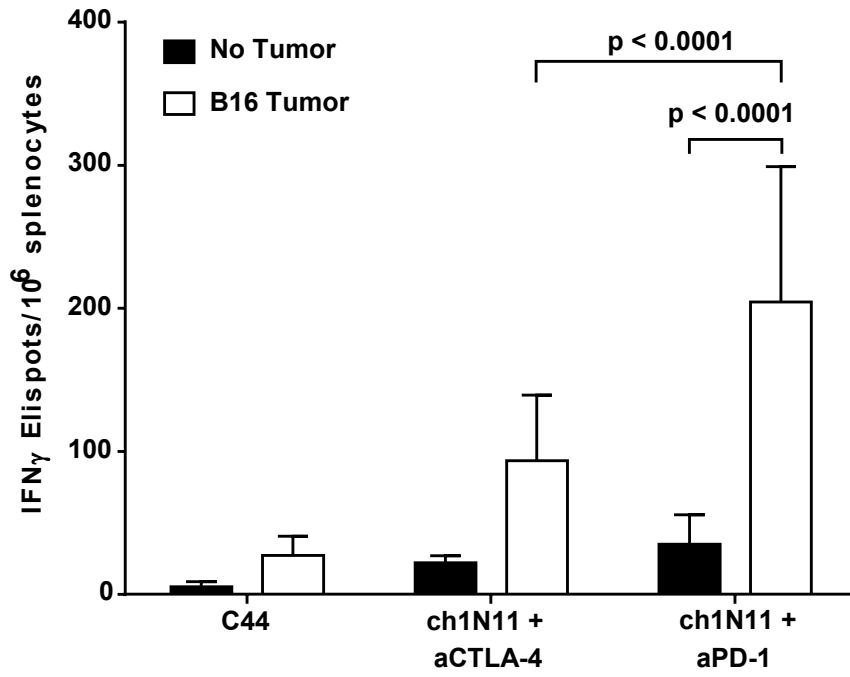

Supplement: NIHMS1648905-supplement-Supp_Figs_1-3.pdf [file NIHMS1648905-supplement-Supp_Figs_1-3.pdf]
